# Supplementary material
Source: Springer Nature journal article supplement (https://www.springermedizin.de/resource/supplementary/12890_2012_404_MOESM13_ESM.pdf/9505132)

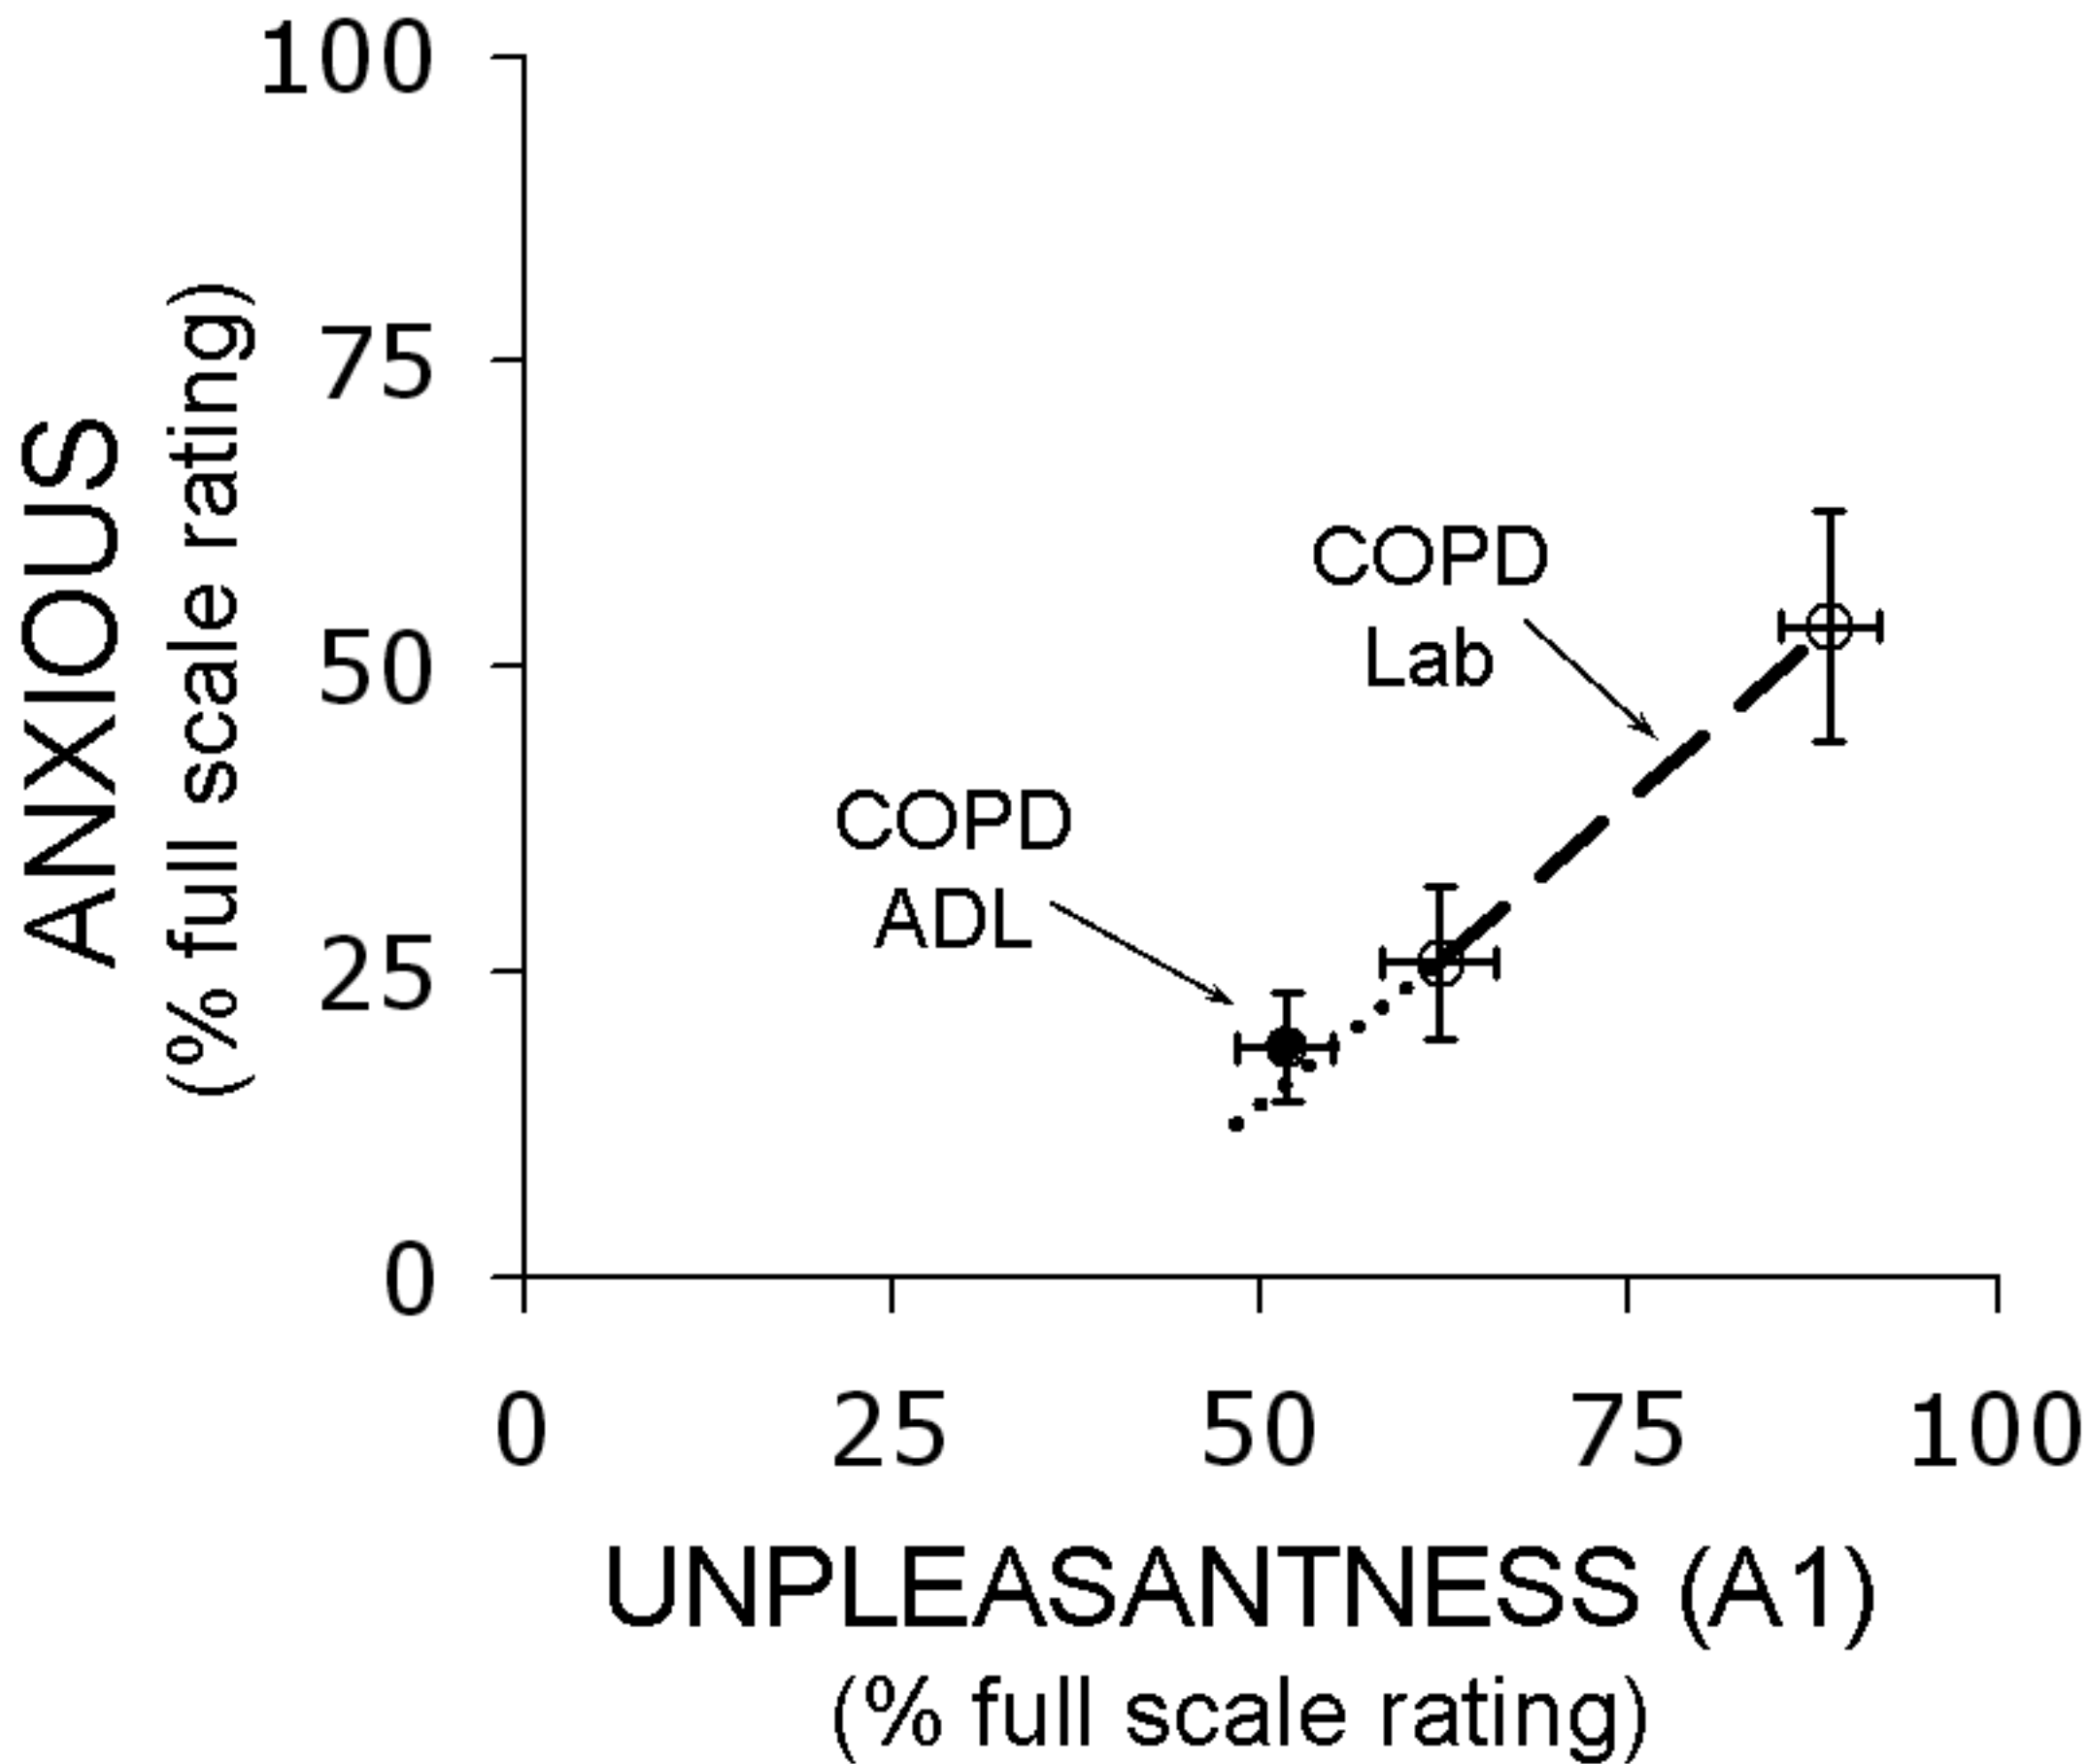

Supplement: MOESM13 [file 9505132]
